# 1 Explaining #TheShoe based on the optimal color hypothesis: The 2 role of chromaticity vs. luminance distribution in ambiguous image

3  
4 Takuma Morimoto<sup>1\*</sup>, Kazuho Fukuda<sup>2</sup> and Keiji Uchikawa<sup>3</sup>

5  
6 1: Department of Experimental Psychology, University of Oxford, Oxford, UK

7 2: Department of Information Design, Kogakuin University, Tokyo, Japan

8 3: Human Media Research Center, Kanagawa Institute of Technology, Atsugi, Japan

9  
10 \*Corresponding author: [takuma.morimoto@psy.ox.ac.uk](mailto:takuma.morimoto@psy.ox.ac.uk)

11 Address: New Radcliffe House, Radcliffe Observatory Quarter, Woodstock Road, Oxford

12 OX2 6GG

13  
14 Keywords: #theShoe, Color constancy, Optimal color, Illuminant estimation

## 15 16 **Abstract**

17 The image of #theShoe is a derivative image of #theDress which induced vastly different  
18 color experiences across individuals. The majority of people perceive that the shoe has  
19 grey leather with turquoise laces, but others report pink leather with white laces. We  
20 hypothesized #theShoe presents the problem of color constancy, where different people  
21 estimated different illuminants falling onto the shoe. The present study specifically aimed  
22 to understand what cues in the shoe image caused the ambiguity based on the optimal  
23 color hypothesis: our visual system knows the gamut of surface colors under various  
24 illuminants and applies the knowledge for illuminant estimation. The analysis showed  
25 that estimated illuminant chromaticity largely changes depending on the assumed  
26 intensity of the illuminant. When the illuminant intensity was assumed to be low, a high  
27 color temperature was estimated. In contrast, assuming high illuminant intensity led to  
28 the estimation of low color temperature. A simulation based on a von Kries correction  
29 showed that the subtraction of estimated illuminants from the original image shifts the

30 appearance of the shoe towards the reported states (i.e. gray-turquoise or pink-white).  
31 These results suggest that the optimal color hypothesis provides a theoretical  
32 interpretation to the #theShoe phenomenon. Moreover, this luminance-dependent color-  
33 shift was observed in #theDress phenomenon, supporting the notion that the same  
34 trigger induced #theShoe.

35

## 36 **1. Introduction**

37 In February 2015 a photograph of a dress became a viral internet phenomenon; the  
38 population was divided on whether they saw the image of a dress as blue and black, or  
39 as white and gold. This phenomenon spread as #theDress and convincingly  
40 demonstrated that individual's color vision systems possess striking variations. One  
41 fascinating aspect of the phenomenon is that different observers experienced different  
42 color appearances whilst conventional color illusions "deceive" people in the same way.  
43 The dress image was recognized as a novel phenomenon in the vision science  
44 community and intensive efforts were made to seek plausible accounts to decode this  
45 mysterious image.

46

47 A substantial amount of studies on #theDress exists to date, but a common claim across  
48 studies seems to be that it presents a problem of color constancy (Brainard & Hurlbert,  
49 2015; Wallisch, 2017; Toscani, Gegenfurtner & Doerschner 2017; Witzel, O'Regan &  
50 Hansmann-Roth, 2017b), which normally enables us to maintain a stable surface color  
51 percept under different lighting environments. Thus, a major focus in past studies was to  
52 identify the factor that causes people to infer different illuminants falling onto the dress.  
53 Proposed accounts range across various stages of visual processing. For example,

54 individual differences in pupil size (Vemuri et al., 2015) and macular pigment density  
55 (Rabin et al., 2016) are reported to show associations with dress appearance. At a post-  
56 receptor level the strength of blue-yellow asymmetry was shown to correlate with the  
57 color naming (Winkler et al., 2015). The importance of the individual variations along  
58 blue-yellow axis is further supported by Feitosa-Santana et al. (2018), who explored  
59 various color tests: color naming and matching, anomaloscope matching, unique white  
60 measurement and color preference rating. One of the earliest studies took a big-data  
61 approach capitalizing upon an online survey (Lafer-Sousa, Hermann & Conway, 2015)  
62 and suggested that age and gender seem to be related to the perception of the dress.  
63 Some studies showed that individuals' chronotypes are weakly associated with dress  
64 percept (Lafer-Sousa & Conway 2017; Aston et al. 2017). Furthermore, a twin study  
65 reported the impact of genetic factor is limited, and thus environmental factors need to  
66 play a role (Mahroo et al., 2017). Neural mechanisms to underpin the dress phenomenon  
67 were also identified using fMRI (Schlaffke et al., 2015) and more recently  
68 electroencephalogram (Retter et al., 2020). They found that the activation of areas that  
69 are known to be associated with top-down modulation are associated with perception of  
70 #theDress, implying the influence of high-level cognition on judging dress appearance.

71

72 Interestingly, various studies demonstrated that it was possible to decrease the ambiguity  
73 by manipulating the dress image. Dixon and Shapiro (2017) pointed out that filtering the  
74 dress image by a low- or high-pass filter removes ambiguity, suggesting how individual  
75 visual systems extract low and high spatial frequency chromatic components might  
76 explain the difference. Similarly, it was shown that color naming changes by occluding  
77 the image (Daoudi et al., 2017), by exposing observers to a brightness illusion (Hugrass

78 et al., 2017), or by embedding explicit cues about the illuminant (Lafer-Sousa et al., 2015,  
79 Witze, Racey & O'Regan, 2017a).

80

81 #theShoe is a later generation of #theDress, which also elicited observer-dependent  
82 color experiences. A majority of observers reported that the shoe has gray leather and  
83 turquoise lace, but some people perceived the shoe with pink leather and white laces  
84 (Werner et al., 2018). However, the shoe phenomenon has been explored very little  
85 (Daoudi et al., 2020) considering the rich amount of studies on the dress. Consequently,  
86 it largely remains unclear whether findings about the dress image can be applied to  
87 #theShoe phenomenon.

88

89 In our previous study of the dress image (Uchikawa, Morimoto & Matsumoto, 2017) we  
90 applied a computational model which we developed for how observers estimate the color  
91 of light illuminating a scene. In the physical world of lights and reflecting surfaces the set  
92 of observed surface colors depends on the color of the illumination. The model derives  
93 an estimate of the illuminant from this constraint which we called the “optimal color  
94 hypothesis”. In this paper we tackled #theShoe phenomenon based on the optimal color  
95 hypothesis, aiming to extract hidden image cues causing the ambiguity.

96

97 A full description of the optimal color model is available elsewhere (Morimoto et al., 2020),  
98 but here we will introduce the basic concept. An optimal color is a hypothetical surface  
99 that consists of only 0% and 100 % reflectances. There are band-pass and band-stop  
100 types as shown in Figures 1 (a) and (b). If we parametrically vary  $\lambda_1$  and  $\lambda_2$  ( $\lambda_1 < \lambda_2$ ), we  
101 can define numerous optimal colors. Panels (c) and (d) show the color distribution of

102 102,721 optimal colors and 49,667 real objects (SOCS, ISO/TR 16066:2003) under the  
103 illuminants of 3000K, 6500K and 20000K on the black body locus. An important aspect  
104 of optimal colors is that since they have an extreme reflectance function, they have the  
105 highest luminance across any colors that have the same chromaticity. Therefore, the  
106 distribution of optimal colors visualizes a physical upper luminance boundary over  
107 chromaticities under a specific illuminant. Panels (c) and (d) show that the color  
108 distribution of real objects behaves in approximately the same way as those of optimal  
109 colors. Thus, if our visual system internalizes the optimal color distribution, we can refer  
110 to it to estimate what illuminant is plausible in a given scene.

111

112 If the optimal color hypothesis is adopted by human observers the model might be able  
113 to guide us to understand why the shoe image can be interpreted by being illuminated  
114 by different illuminants. Such an attempt revealed that estimated color temperature of  
115 illuminants largely shifted as a function of estimated illuminant intensity. When the  
116 illuminant intensity was estimated to be low, the best-fit color temperature was high.  
117 However, as assumed illuminant intensity increased the estimated color temperature  
118 accordingly decreased. Using the illuminants estimated by the model we applied von  
119 Kries correction to the original image to simulate the appearance of the shoe when the  
120 estimated illuminant influence was subtracted. The corrected images seemed to appear  
121 in a single reported state (i.e. turquoise and gray or pink and white). In summary, our  
122 model accounted for #theShoe phenomenon in a similar way that it explained #theDress  
123 phenomenon.

124

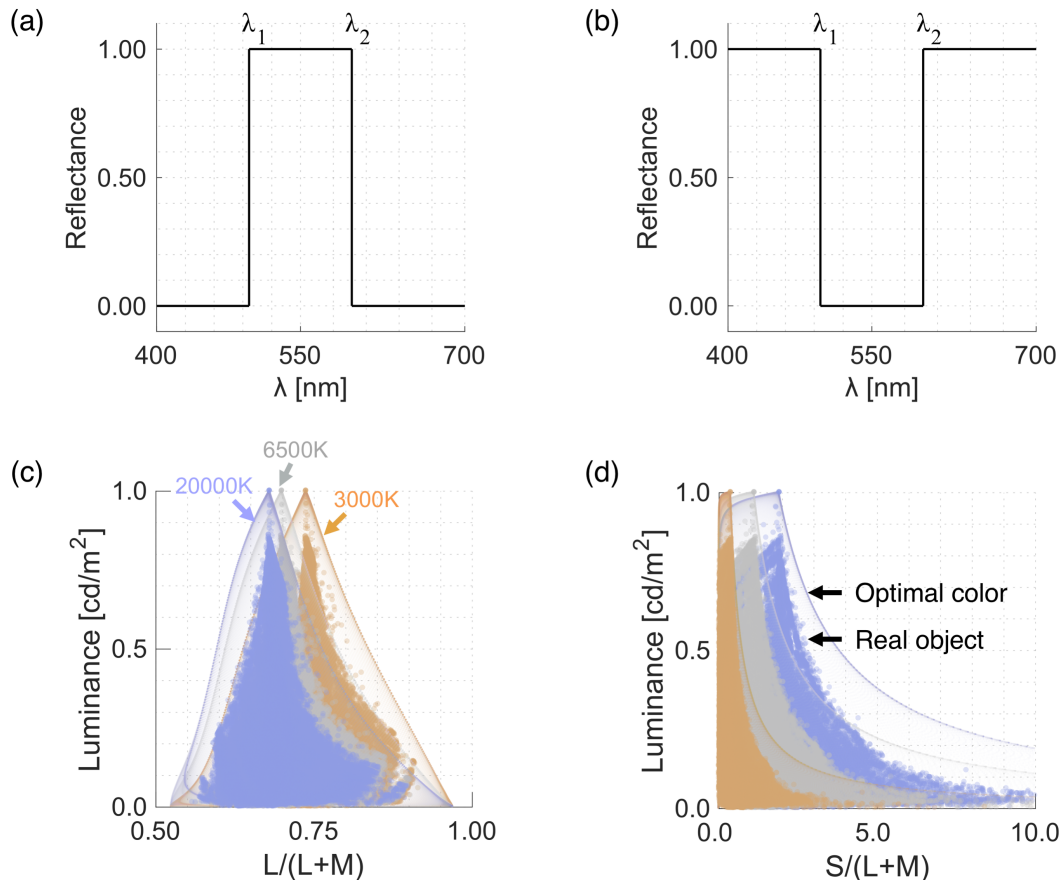

125

126 Figure 1: (a), (b) An example of band-pass and band-stop optimal color. (c), (d)

127 Chromaticity versus luminance distributions of 102,721 optimal colors and 49,667 real

128 objects under illuminants of 3000K, 6500K and 20000K.

129

## 130 2. Analysis method

### 131 2.1 Analyzed image and color distribution

132 Panel (a) in Figure 2 shows the image of the shoe. For the analysis, we first segregated

133 the original image to (b) turquoise or white and (c) gray or pink regions. The original

134 image stored RGB values at each pixel, but the conversion from RGB to cone response

135 is dependent on a monitor on which the image is presented. In the analysis, we assumed

136 that we present the image to an ordinary CRT monitor (NEC, FP2141SB, 21 inches,

137 1600 × 1200 pixels). Using the spectral measurement of the RGB phosphor and gamma  
138 function, we converted RGB values to LMS cone responses based on Stockman and  
139 Sharpe cone fundamentals (Stockman & Sharpe, 2000). The cone responses were  
140 further converted to MacLeod-Boynton chromaticity coordinates (MacLeod & Boynton,  
141 1979), where  $L/(L+M)$  and  $S/(L+M)$  of the equal energy white was scaled to have 0.708  
142 and 1.000.  
143

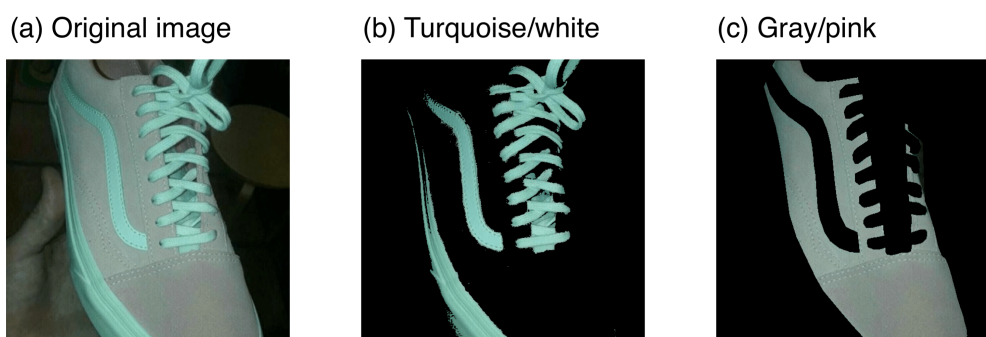

144  
145 Figure 2: (a) The original image of #theShoe. Color appearance of the image is mainly  
146 divided into two groups: turquoise and gray or white and pink. (b), (c) Segregated regions  
147 that appear turquoise or white and gray or pink, respectively.

148  
149 Figure 3 shows the color distribution of the shoe image. The turquoise and gray circles  
150 show the chromaticity and luminance of pixels that belong to the turquoise/white region  
151 (53,398 samples) and the gray/pink region (81,349 samples), respectively. The black  
152 cross symbols indicate mean colors across each region. We used these two mean colors  
153 for the subsequent analysis instead of a whole color distribution. There are two reasons  
154 for this. First, a single pixel is presumably too small to be associated to individual cones  
155 (unless we view the shoe image very closely). Second, our model indiscriminately takes  
156 all colors into equal consideration, therefore it is sensitive to outliers. This use of mean

157 color is also consistent with our previous analysis, allowing for compatibility of results  
158 between the present and the previous study.

159

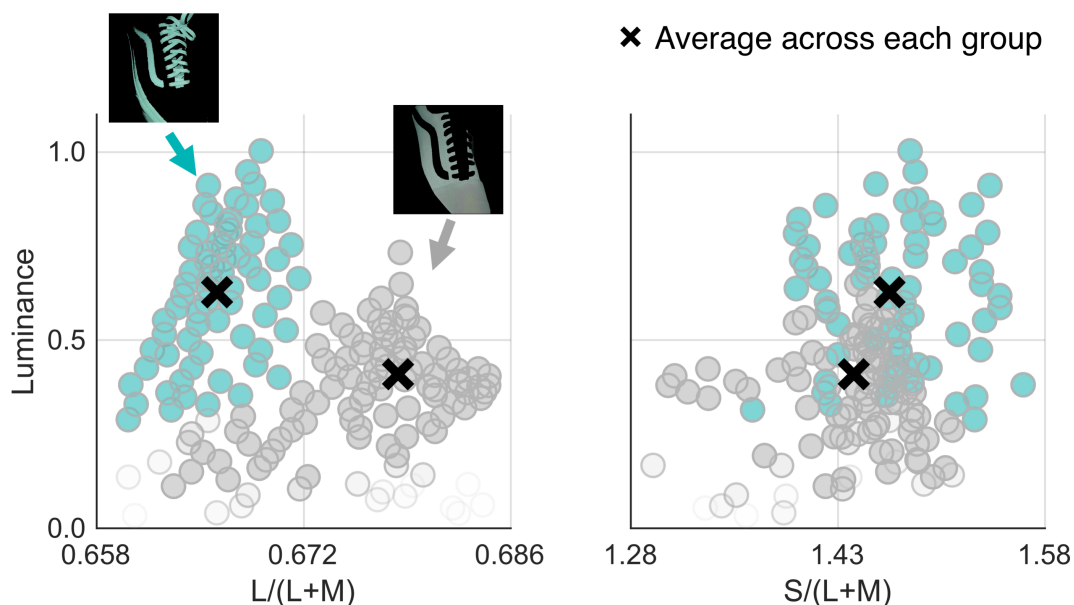

160

161 Figure 3: Color distribution of #theShoe image. The left panel show  $L/(L+M)$  versus  
162 luminance distribution while the right panel denotes the  $S/(L+M)$  versus luminance  
163 distribution. The luminance is normalized by the maximum luminance across all pixels.  
164 Turquoise circles are pixels belonging to the turquoise/white region (panel (b), Figure 2).  
165 Gray circles denote pixels in the gray/pink region (panel (c), Figure 2). Black cross  
166 symbols indicate mean colors across each region that were used for subsequent  
167 analysis.

168

## 169 **2.2 Illuminant estimation based on the optimal color model**

170 We applied the optimal color model to estimate the influence of illuminant on the shoe.

171 In the model framework, it is assumed that the model stores the chromaticity and

172 luminance of all possible optimal colors under 3,478 candidate illuminants: 37 color



173 temperatures from 2000K to 20000K with 500 steps  $\times$  94 intensity levels from 0.671 to  
174 1.25 with 0.00623 steps. The goal of the model is to find illuminants under which the  
175 optimal color distribution and observed color distribution match well, evaluated by  
176 weighted root-mean-squared-error (WRMSE). There were two analyzed colors  $S_1$  and  $S_2$   
177 (namely, mean colors across the turquoise/white region and the gray/pink region,  
178 respectively), and their luminances can be written as  $L_{S1}$  and  $L_{S2}$ . If we define the  
179 luminance of the corresponding optimal colors at their chromaticities as  $L_{O1}$  and  $L_{O2}$ ,  
180 *WRMSE* values for all candidate illuminants are calculated using equation (1).

181

$$182 \quad WRMSE = \sqrt{\frac{w_1(L_{S1} - L_{O1})^2 + w_2(L_{S2} - L_{O2})^2}{w_1 + w_2}} \cdot \cdot \cdot \quad (1)$$

$$183 \quad w_i = \frac{L_{Si}}{L_{Oi}} \quad (i = 1, 2)$$

184

185 We put a weighting  $w_i$  on the error to give a greater weighting to lighter surfaces. Note  
186 that  $w_i$  reaches 1.0 when  $L_{Si}$  (surface luminance) perfectly matches  $L_{Oi}$  (optimal color  
187 luminance). We excluded any illuminants under which either (or both) of the two colors  
188 exceeds the optimal color distribution. When the illuminant intensity level was lower than  
189 0.671, illuminants of any candidate color temperatures were excluded. This is why we  
190 used 0.671 as the lower boundary of candidate intensity level. Then, our goal was to look  
191 for illuminants from the remaining candidates under which the value of *WRMSE* becomes  
192 small. If the model can find small *WRMSE* values for multiple candidate illuminants, it  
193 would imply that the shoe image holds the ambiguity about illuminant influence. The  
194 following section describes that this was the case.

195

196 **3. Results**

197 Figure 4 shows the *WRMSE* plot as a function of the color temperature at five luminance  
198 levels. Notice that some data points are not presented (e.g. there is no data below  
199 19500K for luminance level 0.67). This is because those candidate illuminants were  
200 rejected as one (or two) of the analyzed colors exceeded the optimal color distribution.  
201 Additionally, these five luminance levels were selected arbitrarily, but data exist at other  
202 luminance levels.  
203

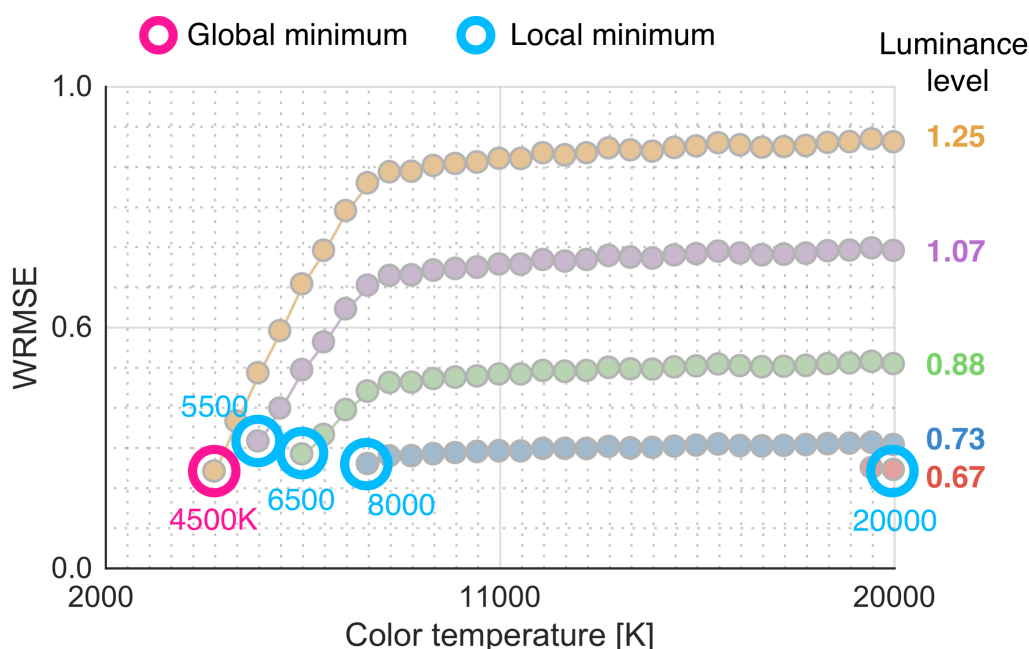

204  
205 Figure 4: *WRMSE* plot as a function of color temperature (2000K to 20000K with 500  
206 steps) at different intensity levels (0.67, 0.73, 0.88, 1.07 and 1.25). Each circle indicates  
207 the *WRMSE* value for one candidate illuminant that has a specific color temperature and  
208 an intensity level. When one or two analyzed colors exceeded the optimal color  
209 distribution of the candidate illuminant, that illuminant was excluded from the analysis.  
210 This is why some regions have no data (e.g. there is no data points below 19500K for  
211 intensity level 0.67).

212 First, the global minimum *WRMSE* value across all candidate illuminants was found at  
213 color temperature 4500K and luminance level 1.25. However, as we decreased the  
214 luminance level low color temperature illuminants were rejected and the trajectory of  
215 *WRMSE* curve changed. As a result, the best-fit color temperatures increased from  
216 4500K to 5500K, 6500K, 8000K and eventually 20000K.

217

218 Figure 5 shows schematic illustration of how the best fit optimal color distributions  
219 change as a function of luminance level. At the luminance level 0.67 an optimal color  
220 distribution under 20000K was found to fit the best. This is because that turquoise/white  
221 surface cannot be covered by the optimal color distribution under low color temperature  
222 illuminants when the intensity is low. However, if we increase the intensity level this  
223 excess no longer happens, and the best-fit color temperature consequently decreased.

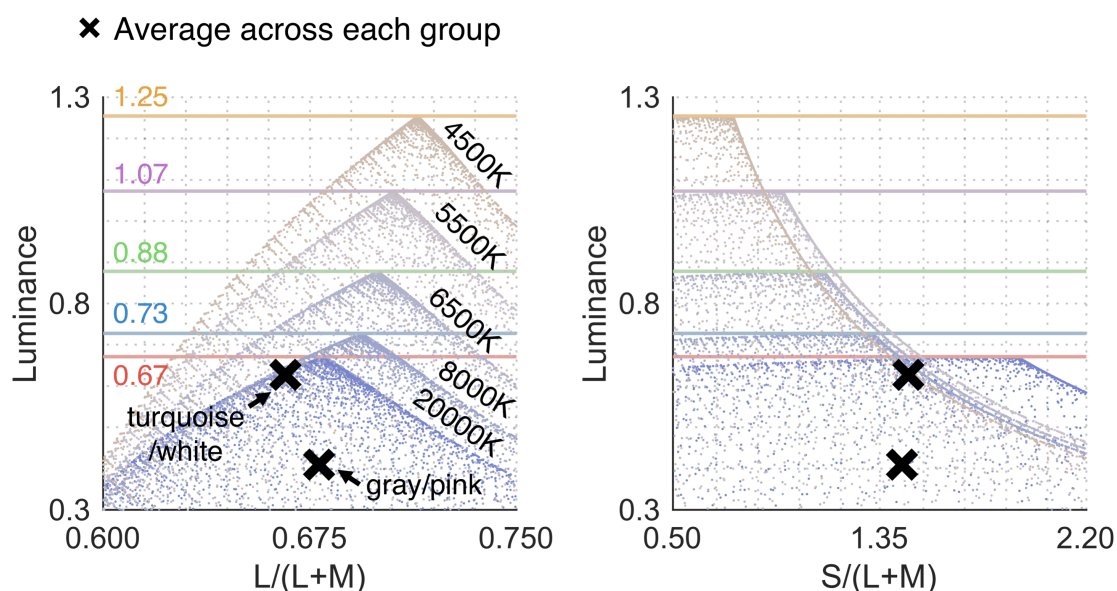

224

225 Figure 5: Best-fit optimal color distributions at different intensity levels. We see that  
226 estimated color temperature continuously changes from high to low color temperature  
227 as the estimated illuminant intensity increases.

228 Overall we found that depending on the luminance level of illuminants we are searching  
229 through *WRMSE* values converged to different color temperatures. It is worth noting that  
230 although we found an illuminant of 4500K as the global minimum (the magenta circle in  
231 Figure 4), the *WRMSE* value is nearly the same as those of local minimums (cyan circles  
232 in Figure 4). In other words, these candidate illuminants are nearly equally plausible,  
233 which might explain the ambiguity of the shoe image.

234

235 Next, using the estimated illuminants we simulated the color appearance of the shoe  
236 when those illuminant influences are subtracted from the original image. Specifically we  
237 applied a von Kries correction which scales cone signals  $L$ ,  $M$  and  $S$  at each pixel by the  
238 proportion between cone responses under equal energy white ( $L_w$ ,  $M_w$ , and  $S_w$ ) and  
239 under an estimated illuminant ( $L_e$ ,  $M_e$ , and  $S_e$ ) to simulate cone signals as if it were placed  
240 under an equal energy white illuminant. This manipulation is written as equation (2).

241

$$242 \begin{pmatrix} L' \\ M' \\ S' \end{pmatrix} = \begin{pmatrix} L_w/L_e & 0 & 0 \\ 0 & M_w/M_e & 0 \\ 0 & 0 & S_w/S_e \end{pmatrix} \begin{pmatrix} L \\ M \\ S \end{pmatrix} \cdot \cdot \cdot \quad (2)$$

243

244 Obtained  $L'$ ,  $M'$ , and  $S'$  values were then converted to RGB values for the display  
245 presentation. Figure 6 provides a summary of the analysis with von Kries corrected  
246 images. The gray small and colored circles together show how the best-fit color  
247 temperatures change as a function of assumed illuminance (47 levels from 0.67 to 1.25  
248 with 0.0125 steps). The five colored circles are representative data points used as  
249 examples in Figure 4 and 5. We see that estimated color temperature continuously  
250 changes as opposed to bimodally. The von Kries scaled images shown at the upper part

251 of the figure demonstrates that the color appearance of the shoes dramatically changes  
252 depending on the color temperature of corrected illuminants. When the image is  
253 corrected by high color temperature (e.g. ①), the shoe potentially appears white and  
254 pink. In contrast, the correction by low color temperature (e.g. ⑤) seems to yield a  
255 turquoise and gray appearance. Note that the effect of this simulation depends on  
256 presented monitor and individuals.

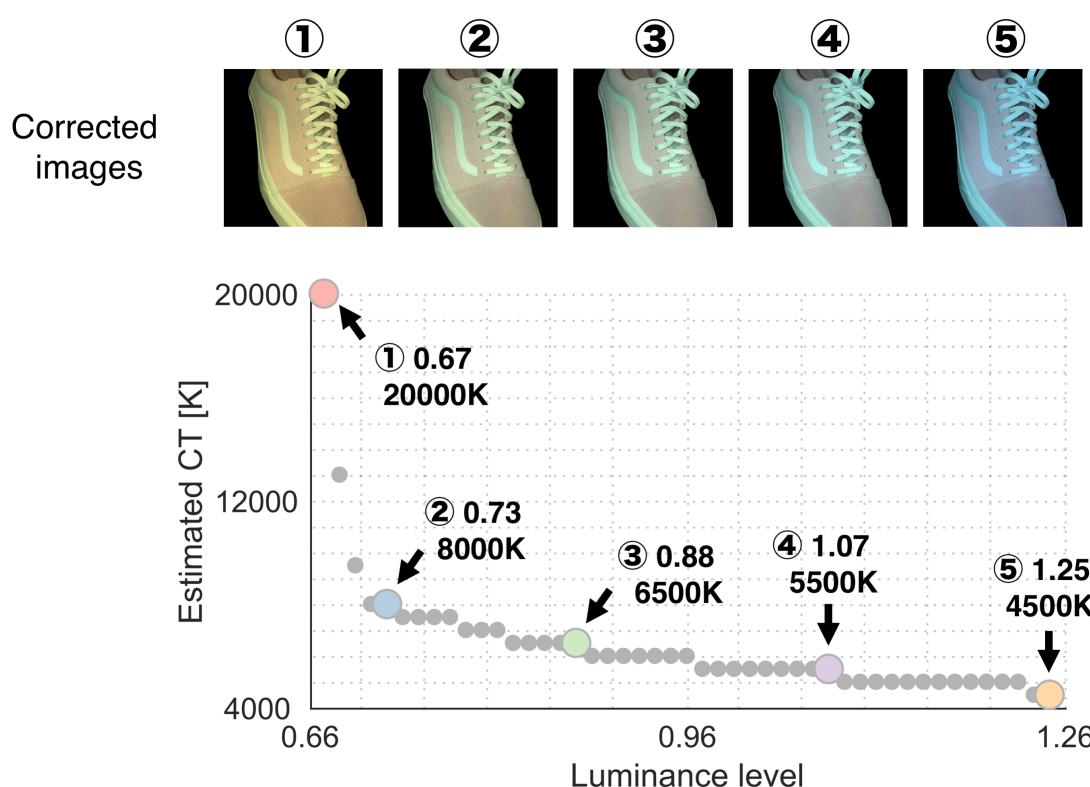

257  
258 Figure 6: The gray small and colored circles together show the estimated color  
259 temperatures (CT) as a function of assumed at 47 luminance levels from 0.67 to 1.25  
260 with 0.0125 steps. Five colored circles are five representatives estimated color  
261 temperatures: 20000K, 8000K, 6500K, 5500K and 4500K. Images above show corrected  
262 images where the influence of illuminant was subtracted from the original image based  
263 on von Kries scaling (detailed in the main text). Color appearance of the shoe largely  
264 changes depending on the corrected color temperatures.

265 **4. Discussion**

266 A major finding in the present study is that our model suggested more than one plausible  
267 illuminant. The *WRMSE* values for the global minimum and local minima were found to  
268 be fairly close, which provides a potential reason why the image is open to various  
269 interpretations about the illuminations. Estimated illuminant color temperatures changed  
270 depending on the assumed illuminance of illuminants. Because the turquoise/white  
271 region has higher luminance than gray/pink region (as demonstrated in Figure 5), the  
272 low color temperature cannot be a candidate illuminant when the illuminant intensity is  
273 assumed to be low. This observation suggests that how luminance values of surfaces  
274 are associated with their chromaticities (e.g. geometry of color distribution) plays a  
275 crucial role.

276

277 A similar intensity-dependent color-shift was also found in the analysis of the dress  
278 (Uchikawa, Morimoto & Matsumoto 2017). For comparison, Figure 7 shows a  
279 chromaticity versus luminance distribution of the dress image, formed by 20 pixels  
280 sampled from each of the blue/white and black/gold regions. Figure 3 and 7 allow us to  
281 see that the geometry of chromaticity versus luminance distributions for the dress and  
282 shoe image are somewhat similar, although the range of chromaticity seems to be much  
283 wider for the dress. This similarity in the relative shape of color distributions seems to  
284 underlie ambiguities in both images.

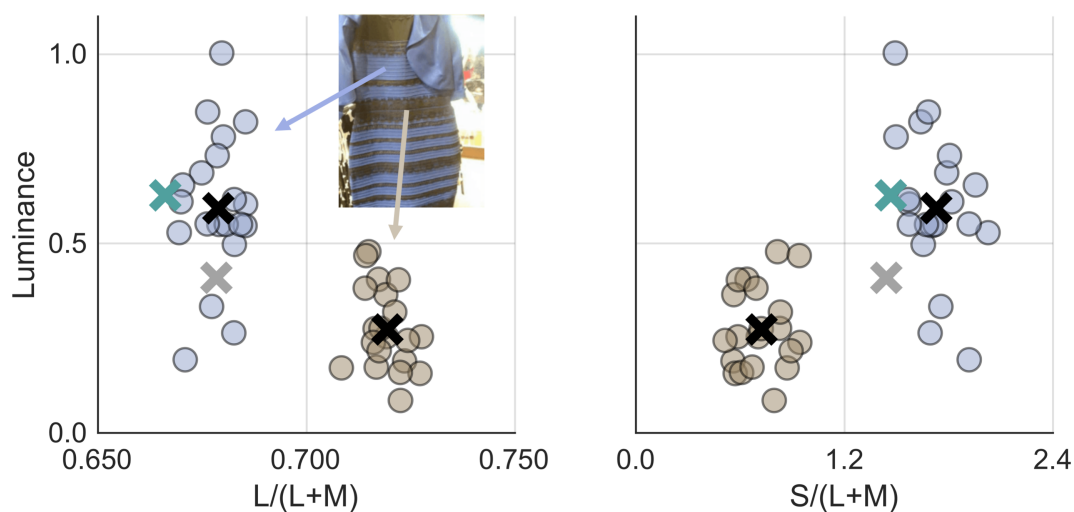

285

286 Figure 7: Chromaticity versus luminance distribution of the #theDress image. Blue and  
287 brown circles are 20 pixels sampled from the blue/white and the black/gold region in the  
288 image, respectively. Black cross symbols indicate mean chromaticities across each  
289 region. Green and gray cross symbols are the mean color across turquoise/white and  
290 gray/pink regions in the shoe image for the sake of comparison.

291

292 Figure 6 suggests that best-fit color temperature changes *continuously* as a function of  
293 assumed intensity as opposed to *discretely*. In other words, it is possible the color  
294 appearance of the shoe image might also vary gradually from one individual to another,  
295 which seems to be demonstrated by a set of von Kries corrected images in Figure 6.  
296 This casts doubt on the notion that #theShoe and #theDress are a bi-modal phenomenon.  
297 Regarding the #theShoe phenomenon, Werner et al. (2018) indeed showed that  
298 observers were divided into three groups: gray-turquoise (53%), pink-white (34%) and  
299 pink-turquoise (11%). Some studies also reported that the dress phenomenon does not  
300 seem to be bi-modal (Gegenfurtner, Bloj & Toscani, 2015; Lafer-Sousa & Conway 2017).

301

302 One question raised from the shoe and the dress images is whether such ambiguous  
303 images happen because the object has only two color categories. It is worth reminding  
304 ourselves that regardless of whether the image is the shoe or the dress, color constancy  
305 always imposes a challenge of ambiguity about surface and illuminant colors to our visual  
306 system. In an extreme scene where only one surface exists, color constancy is  
307 essentially lost. In this sense the success of color constancy heavily depends on the  
308 number of surface colors available in a scene. Many influential color constancy  
309 algorithms such as mean chromaticity (Buchsbaum, 1980) or chromaticity-luminance  
310 correlation (Golz & MacLeod, 2002) requires a sufficient number of surfaces. Our optimal  
311 color model is not an exception. As more surface colors become available in a scene,  
312 the shape of color distribution becomes clearer, leading to better and unique model fitting.  
313 It is worth emphasizing that the basis of the optimal color model is that if the chromaticity  
314 versus luminance distribution of a given scene behaves in a similar way as those of  
315 optimal colors, the visual system can effectively estimate the illuminant color. It is  
316 probably not the case for the shoe image (and the dress image), which presumably  
317 provides the main reason why our model estimated more than one candidate illuminant  
318 in the analysis.

319

320 Recent papers by Wallisch & Karlovich (2019) and Witzel & Toscani (2020) proposed a  
321 way to generate an ambiguous image. It was importantly shown that the ambiguity still  
322 remains when the chromatic property of the dress image was mapped onto a different  
323 bicolored object. This result supports the importance of color distribution which is  
324 consistent with the finding in the present study. Also, we agree with the view that  
325 generating ambiguous images freely is a powerful way to show that we understood why



326 ambiguity happens. Based on the analysis in this study we would suspect that following  
327 conditions seem to be keys to generating a bi-stable image. Firstly, a scene needs to  
328 have a color distribution such that it does not well agree well with optimal color  
329 distribution and best-fit color temperature (preferably largely) changes depending on  
330 assumed intensity level. Second, by correcting the influence of estimated illuminants  
331 from the image the chromatic coordinates must cross the border of color categories so  
332 that people use a different color name. Figure S1 in supplementary material shows how  
333 chromaticities change in response to von Kries correction. Thirdly, the image needs to  
334 pose an ambiguity about illuminant intensity. This would be important because if the  
335 intensity of illuminant is obvious we may not need to search candidate illuminants over  
336 various intensity levels. It is an open question as to whether these are necessary  
337 conditions, or sufficient conditions. For example, the spatial structure was shown to be  
338 important in #theDress phenomenon (Hesslinger & Carbon, 2016; Jonauskaitė et al,  
339 2018). In any case, one advantage to having a computational model is that we can  
340 theoretically test whether a newly generated image is likely to induce a bi-stable percept.  
341 We believe that extending this study towards this direction will help further in  
342 understanding of the nature of these curious bi-stable images.

343

#### 344 **Supplementary material**

##### 345 **The effect of von Kries correction on mean chromaticity**

346 Figure S1 shows how the mean chromaticities of the lace part and leather part change  
347 in response to a von Kries correction. Note that this figure shows a result of subtracting  
348 an illuminant color, which thus indicate illuminant-free reflectance-based representation  
349 of chromaticities. The black circles and the black triangle symbols denote the mean color

350 across lace part and leather part of the original image, respectively. We see that when  
 351 we correct the original image by low color temperature (as in the case of ⑤), the mean  
 352 color shifts towards high  $L/(L+M)$  and low  $S/(L+M)$ , being closer to the white point. In  
 353 contrast, when the image is corrected by high color temperature (as in the case of ①)  
 354 colors shift towards the direction of low  $L/(L+M)$  and high  $S/(L+M)$ . We suspect that as a  
 355 result of these transformations chromatic coordinates cross color categories, which  
 356 consequently induces observer-dependent color naming.  
 357

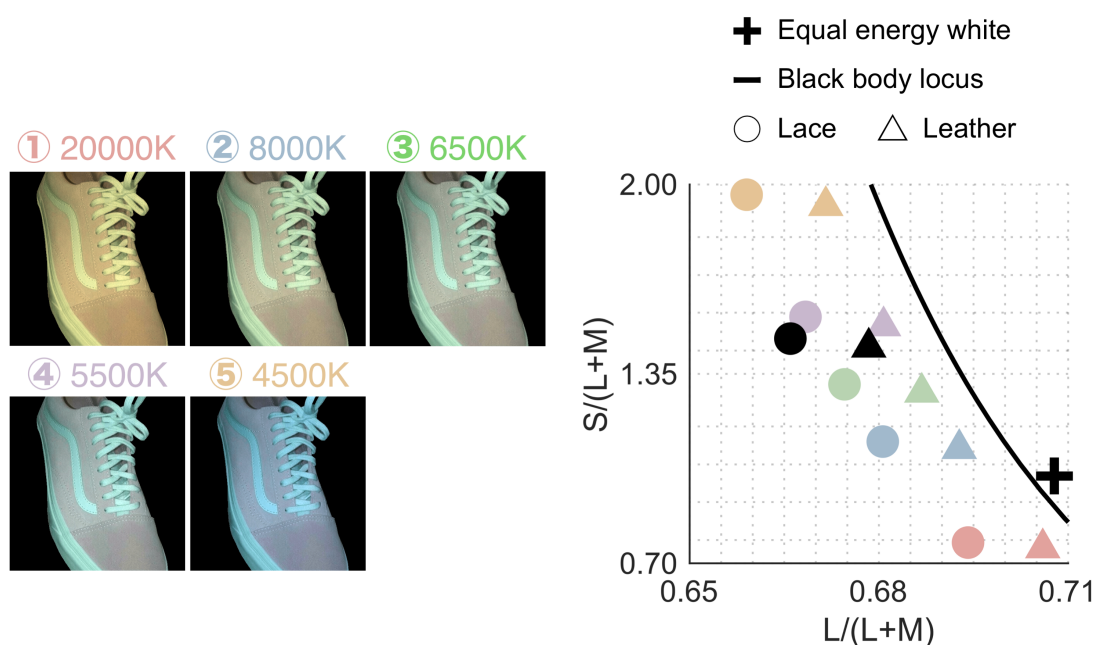

358  
 359 Figure S1: How chromaticities of the lace (circle symbols) and leather part (triangle  
 360 symbols) changes in response to a von Kries correction. These chromaticities  
 361 correspond to reflectance-based representation which is free from illuminant influence.  
 362 Color label indicates the corrected color temperature as shown at the left part of the  
 363 figure (corrected by ①: 20000K, ②: 8000K, ③: 6500K, ④: 5500K, and ⑤: 4500K).  
 364 The black circle and black triangle symbols indicate the chromatic coordinates of original  
 365 image. Note that the color label is kept the same as Figure 6.

366 **Acknowledgement**

367 This work was supported by JSPS KAKENHI Grant Number JP19K22881, JP17K04503  
368 and 26780413. TM is supported by a Sir Henry Wellcome Postdoctoral Fellowship  
369 awarded from the Wellcome Trust (218657/Z/19/Z). The authors thank Tanner DeLawyer  
370 for careful grammatical correction.

371

372 **Reference**

373 Aston, S., & Hurlbert, A. (2017). What #theDress reveals about the role of illumination  
374 priors in color perception and color constancy. *Journal of Vision*, 17(9), 1–18.  
375 <https://doi.org/10.1167/17.9.4>

376 Brainard, D. H., & Hurlbert, A. C. (2015). Colour Vision: Understanding # TheDress.  
377 *Current Biology*, 25, R551–R554.

378 Buchsbaum, G. (1980). A spatial processor model for object colour perception. *Journal*  
379 *of the Franklin Institute*, 310, 1, 1–26.

380 Daoudi, L. D., Doerig, A., Parkosadze, K., Kunchulia, M., & Herzog, M. H. (2017). The  
381 role of one-shot learning in # TheDress. *Journal of Vision*, 17(3), 1–7.  
382 <https://doi.org/10.1167/17.3.15.doi>

383 Daoudi, L. D., Doerig, A., Parkosadze, K., Kunchulia, M., & Herzog, M. H. (2020). How  
384 stable is perception in #TheDress and #TheShoe? *Vision Research*, 169, 1–5.  
385 <https://doi.org/10.1016/j.visres.2020.01.007>

386 Dixon, E. L., & Shapiro, A. G. (2017). Spatial filtering, color constancy, and the color-  
387 changing dress. *Journal of Vision*, 17(3), 1–20. <https://doi.org/10.1167/17.3.7>

388 Feitosa-Santana, C., Lutze, M., Barrionuevo, P. A., & Cao, D. (2018). Assessment of  
389 #TheDress With Traditional Color Vision Tests: Perception Differences Are Associated  
390 With Blueness. *i-Perception*, 9(2), 1–17.

391 Gegenfurtner, K. R., Bloj, M., & Toscani, M. (2015). The many colours of ‘the dress’.  
392 *Current Biology*, 25, R1–R2.

393 Golz, J., and MacLeod, D. I. A (2002) Influence of scene statistics on colour constancy.  
394 *Nature*, 415, 637–640.

395 Hesslinger, V. M., & Carbon, C. C. (2016). TheDress: The role of illumination information  
396 and individual differences in the psychophysics of perceiving white-blue ambiguities. *I-*  
397 *Perception*, 7(2), 1–10. <https://doi.org/10.1177/2041669516645592>

398 Hugrass, L., Slavikova, J., Horvat, M., Musawi, A. Al, & Crewther, D. (2017). Temporal  
399 brightness illusion changes color perception of “the dress.” *Journal of Vision*, 17(5),  
400 1–7. <https://doi.org/10.1167/17.5.6>

401 Jonauskaite, D., Dael, N., Parraga, C. A., Chèvre, L., García Sánchez, A., & Mohr, C.

- 402 (2018). Stripping #The Dress: the importance of contextual information on inter-  
403 individual differences in colour perception. *Psychological Research*.
- 404 Lafer-Sousa, R., Hermann, K. L., & Conway, B. R. (2015). Striking individual differences  
405 in color perception uncovered by ‘the dress’ photograph. *Current Biology*, 25, R1–R2.
- 406 Lafer-Sousa, R., & Conway, B. R. (2017). #TheDress: Categorical perception of an  
407 ambiguous color image. *Journal of Vision*, 17(12), 1–30.
- 408 MacLeod, D. I. A., & Boynton, R. M. (1979) Chromaticity diagram showing cone  
409 excitation by stimuli of equal luminance. *Journal of the Optical Society of America A*,  
410 69, 1183–1186.
- 411 Mahroo, O. A., Williams, K. M., Hossain, I. T., Yonova-Doing, E., Kozareva, D., Yusuf, A.,  
412 Hammond, C. J. (2017). Do twins share the same dress code? Quantifying relative  
413 genetic and environmental contributions to subjective perceptions of “the dress” in a  
414 classical twin study. *Journal of Vision*, 17(1), 1–7. <https://doi.org/10.1167/17.1.29>
- 415 Morimoto, T., Kusuyama, T., Fukuda, K., & Uchikawa, K. (2020). Color constancy based  
416 on the geometry of color distribution. *bioRxiv*.  
417 <https://doi.org/10.1101/2020.05.19.105254>
- 418 Rabin, J., Houser, B., Talbert, C., & Patel, R. (2016). Blue-black or white-gold? Early  
419 stage processing and the color of “the dress.” *PLoS ONE*, 11(8), 1–10.
- 420 Retter, T. L., Gwinn, O. S., O’Neil, S. F., Jiang, F., & Webster, M. A. (2020). Neural  
421 correlates of perceptual color inferences as revealed by #thedress. *Journal of Vision*,  
422 20(3), 1–20.
- 423 Schlaffke, L., Golisch, A., Haag, L. M., Lenz, M., Heba, S., Lissek, S., Tegenthoff, M.  
424 (2015). The brain’s dress code: How The Dress allows to decode the neuronal pathway  
425 of an optical illusion. *Cortex*, 73, 271–275.
- 426 Stockman, A. and Sharpe, L. T. (2000) The spectral sensitivities of the middle- and long-  
427 wavelength-sensitive cones derived from measurements in observers of known  
428 genotype. *Vision Research*, 40, 1711–1737.
- 429 Toscani, M., Gegenfurtner, K. R., & Doerschner, K. (2017). Differences in illumination  
430 estimation in #thedress. *Journal of Vision*, 17(1), 1–14.
- 431 Uchikawa, K., Morimoto, T., & Matsumoto, T. (2017). Understanding individual  
432 differences in color appearance of #TheDress” based on the optimal color hypothesis.  
433 *Journal of Vision*, 17, 1-14.
- 434 Vemuri, K., Bisla, K., Mulpuru, S., & Varadharajan, S. (2016). Do normal pupil diameter  
435 differences in the population underlie the color selection of #thedress? *Journal of the*  
436 *Optical Society of America A*, 33(3), A137–A142.
- 437 Wallisch, P. (2017). Illumination assumptions account for individual differences in the

- 438 perceptual interpretation of a profoundly ambiguous stimulus in the color domain: “The  
439 dress.” *Journal of Vision*, 17(4), 1–14. <https://doi.org/10.1167/17.4.5>
- 440 Wallisch, P., & Karlovich, M. (2019). Disagreeing about Crocs and socks: Creating  
441 profoundly ambiguous color displays. *BioRxiv*, 1–24.
- 442 Werner, A., Fuchs, S., Kersten, Y., Salinas, M. (2018). #TheShoe is the new #TheDress  
443 - a colour ambiguity involving the red-green axis needs a new explanation. *Journal of*  
444 *Vision* 18(10) 891. (Vision Sciences Society Annual Meeting Abstract)
- 445 Winkler, A. D., Spillmann, L., Werner, J. S., & Webster, M. A. (2015). Asymmetries in  
446 blue–yellow color perception and in the color of ‘the dress.’ *Current Biology*, 25, R1–  
447 R2.
- 448 Witzel, C., Racey, C., & O’Regan, J. K. (2017a). The most reasonable explanation of “the  
449 dress”: Implicit assumptions about illumination. *Journal of Vision*, 17(2), 1–19.
- 450 Witzel, C., O’Regan, J. K., & Hansmann-Roth, S. (2017b). The dress and individual  
451 differences in the perception of surface properties. *Vision Research*, 141, 76–94.
- 452 Witzel, C., & Toscani, M. (2020). How to make a #theDress. *Journal of the Optical Society*  
453 *of America A*, 37(4), A202–A211.
